# Supplementary material
Source: publisher figshare collection journal article supplement (https://tandf.figshare.com/articles/dataset/_/5491804)
Supplement: Supplementary file 2 [file 1]

## **Supplementary data**

**Appendix 1.** Overview of the top-down modelling chain used by the VOLANTE project to implement policy scenarios and feed in the ecosystem service supply assessment.

**Appendix 2.** Overview of the three policy alternatives.

**Appendix 3.** Regional changes in ES supply between 2010 and 2040 under the “Nature Protection” policy alternative.

**Appendix 4.** Regional changes in ES supply between 2010 and 2040 under the “PES for C sequestration” policy alternative.

**Appendix 5.** Regional changes in ES supply between 2010 and 2040 under the “PES for recreational ES” policy alternative.
